# Supplementary material
Source: PubMed Central journal article supplement (PMC6713231)
Supplement: NIHMS1044218-supplement-Supplemental_Table.pdf [file NIHMS1044218-supplement-Supplemental_Table.pdf]

**Supplemental Table 1: TG level by Race/Ethnicity (adjusted for age, sex, SSPG, and BMI) excluding patients on anti-hyperlipidemic agents**

| Non-Hispanic White    | Hispanic White        | South Asian            | East Asian             | African American | P-value |
|-----------------------|-----------------------|------------------------|------------------------|------------------|---------|
| 144 ± 5<br>(134, 154) | 119 ± 13<br>(94, 145) | 133 ± 12<br>(109, 156) | 158 ± 12<br>(133, 182) | 104 ± 16*        | <0.01   |

Data shown as mean ± SE and 95% confidence interval (in parentheses). TG values displayed in mg/dL; statistical analysis performed on natural-log transformed TG levels. Covariates in the model are evaluated at the following values: Age 49 years, Sex 1.4 (where sex = “1” if female and “2” if male), SSPG 159 mg/dL, BMI 29.7 kg/m<sup>2</sup>. P-value ≤0.05 considered statistically significant.

\*Statistically significant difference compared to non-Hispanic white individuals
